# Supplementary material for: Trans-ethnic Fine Mapping Highlights Kidney-Function Genes Linked to Salt Sensitivity
Source: PubMed Central journal article supplement (PMC5011075; doi:10.1016/j.ajhg.2016.07.012), 2016-09-01
Supplement: mmc1.pdf [file mmc1.pdf]

## Supplemental Data

### Trans-ethnic Fine Mapping Highlights

#### Kidney-Function Genes Linked to Salt Sensitivity

Anubha Mahajan, Aylin R. Rodan, Thu H. Le, Kyle J. Gaulton, Jeffrey Haessler, Adrienne M. Stilp, Yoichiro Kamatani, Gu Zhu, Tamar Sofer, Sanjana Puri, Jeffrey N. Schellinger, Pei-Lun Chu, Sylvia Cechova, Natalie van Zuydam, the SUMMIT Consortium, the BioBank Japan Project, Johan Arnlov, Michael F. Flessner, Vilmantas Giedraitis, Andrew C. Heath, Michiaki Kubo, Anders Larsson, Cecilia M. Lindgren, Pamela A.F. Madden, Grant W. Montgomery, George J. Papanicolaou, Alex P. Reiner, Johan Sundström, Timothy A. Thornton, Lars Lind, Erik Ingelsson, Jianwen Cai, Nicholas G. Martin, Charles Kooperberg, Koichi Matsuda, John B. Whitfield, Yukinori Okada, Cathy C. Laurie, Andrew P. Morris, and Nora Franceschini

**Figure S1. Dendrogram to summarise relatedness between studies.** The dendrogram was constructed on the basis of genome-wide pair-wise allele frequency differences between studies. European ancestry studies are grouped in the red cluster, and Hispanic ancestry studies are grouped in the blue cluster.

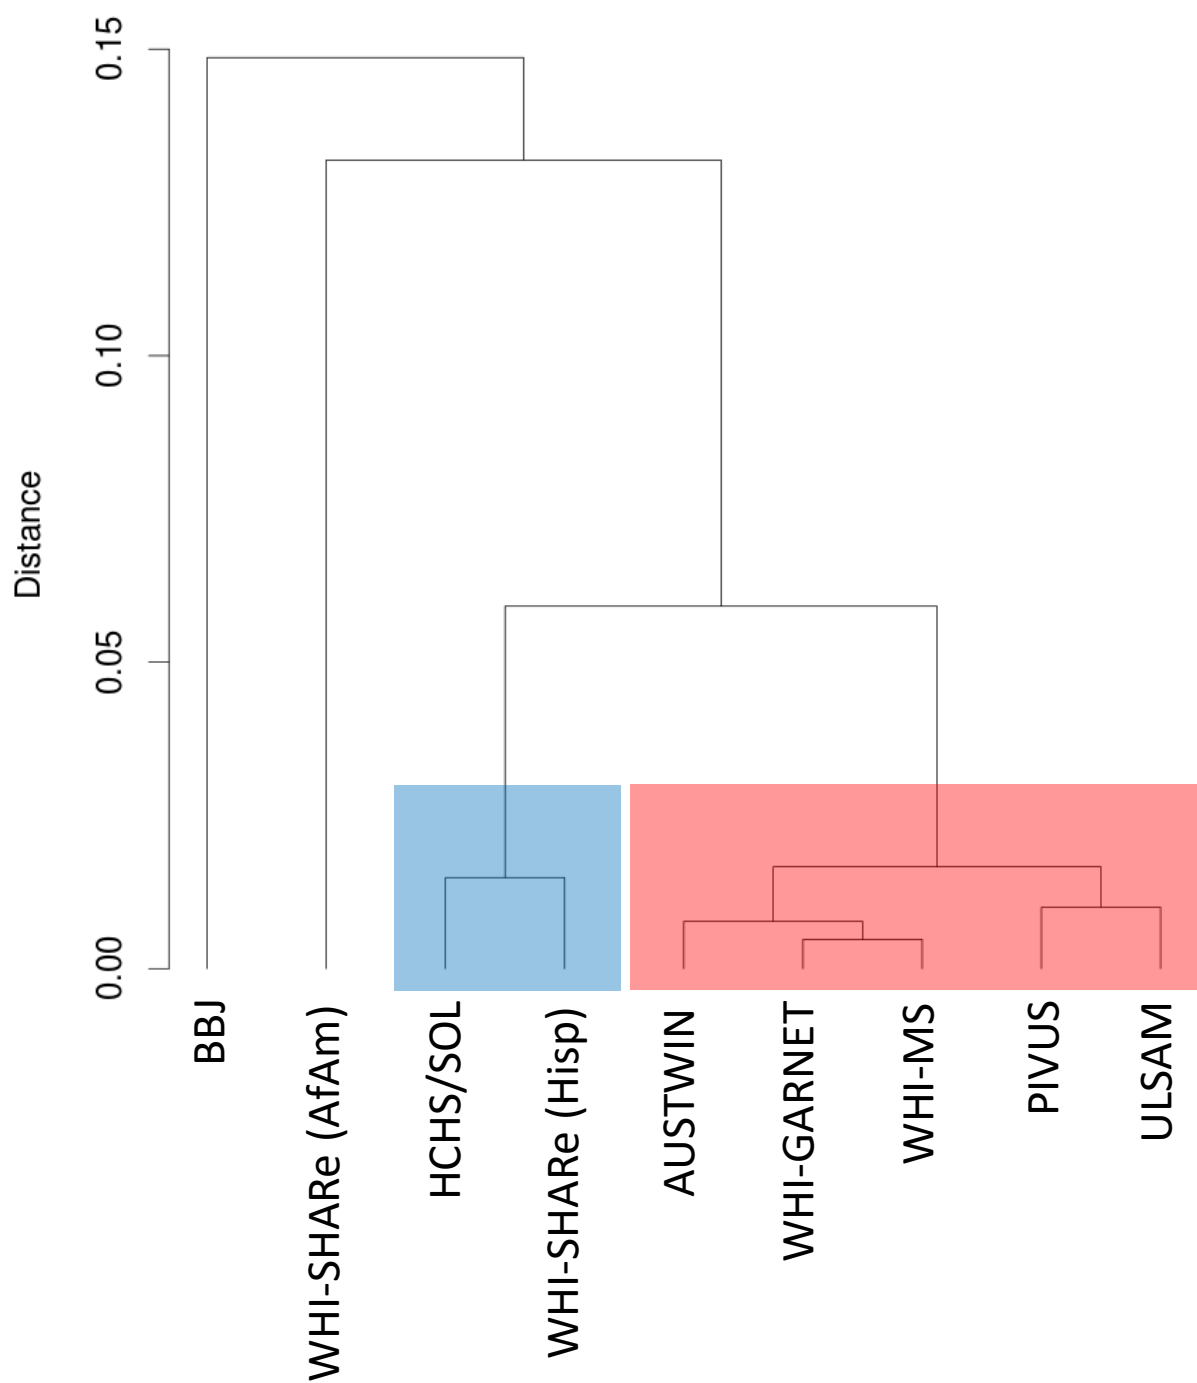

**Figure S2. Genome-wide eGFR association summary from the trans-ethnic meta-analysis of 71,638 individuals.** Each point corresponds to a SNP passing quality control in the meta-analysis, plotted according to physical position (NCBI build 37) on the x-axis and  $-\log_{10} p$ -value on the y-axis. The locus names of loci attaining genome-wide significance ( $p < 5 \times 10^{-8}$ , horizontal red line) are highlighted above the Manhattan plot. Association signals mapping to previously established loci are highlighted in green.

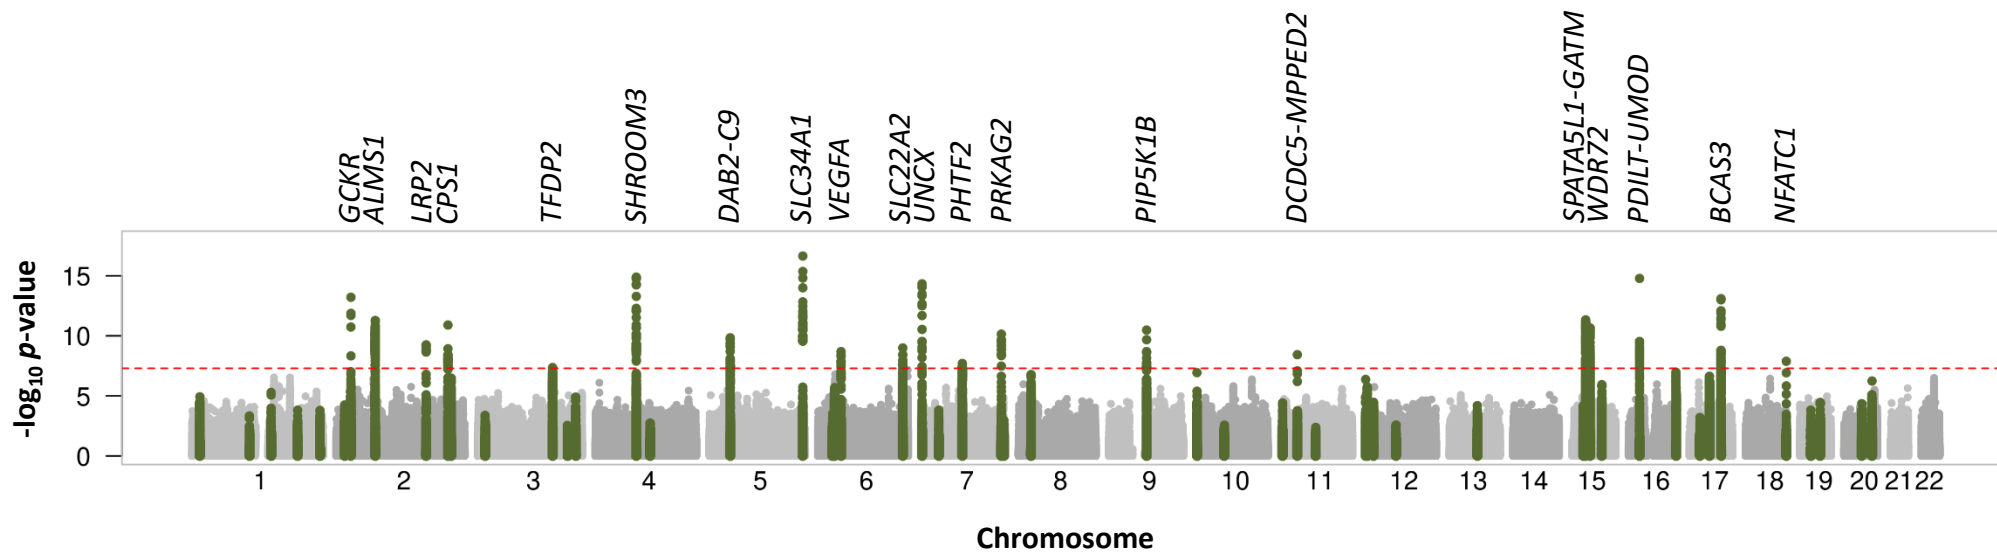

**Figure S3. Comparison of allelic effects (beta) of lead SNPs on eGFR in the general population (from our trans-ethnic meta-analysis of 71,638 individuals) and in diabetics (from a meta-analysis of 13,158 individuals from the SUMMIT Consortium). Grey bars represent 95% confidence intervals for allelic effect sizes. The lead SNP at the *PDILT-UMOD* locus demonstrates greater allelic effect on eGFR in diabetics than in the general population at nominal significance ( $p < 0.05$ ).**

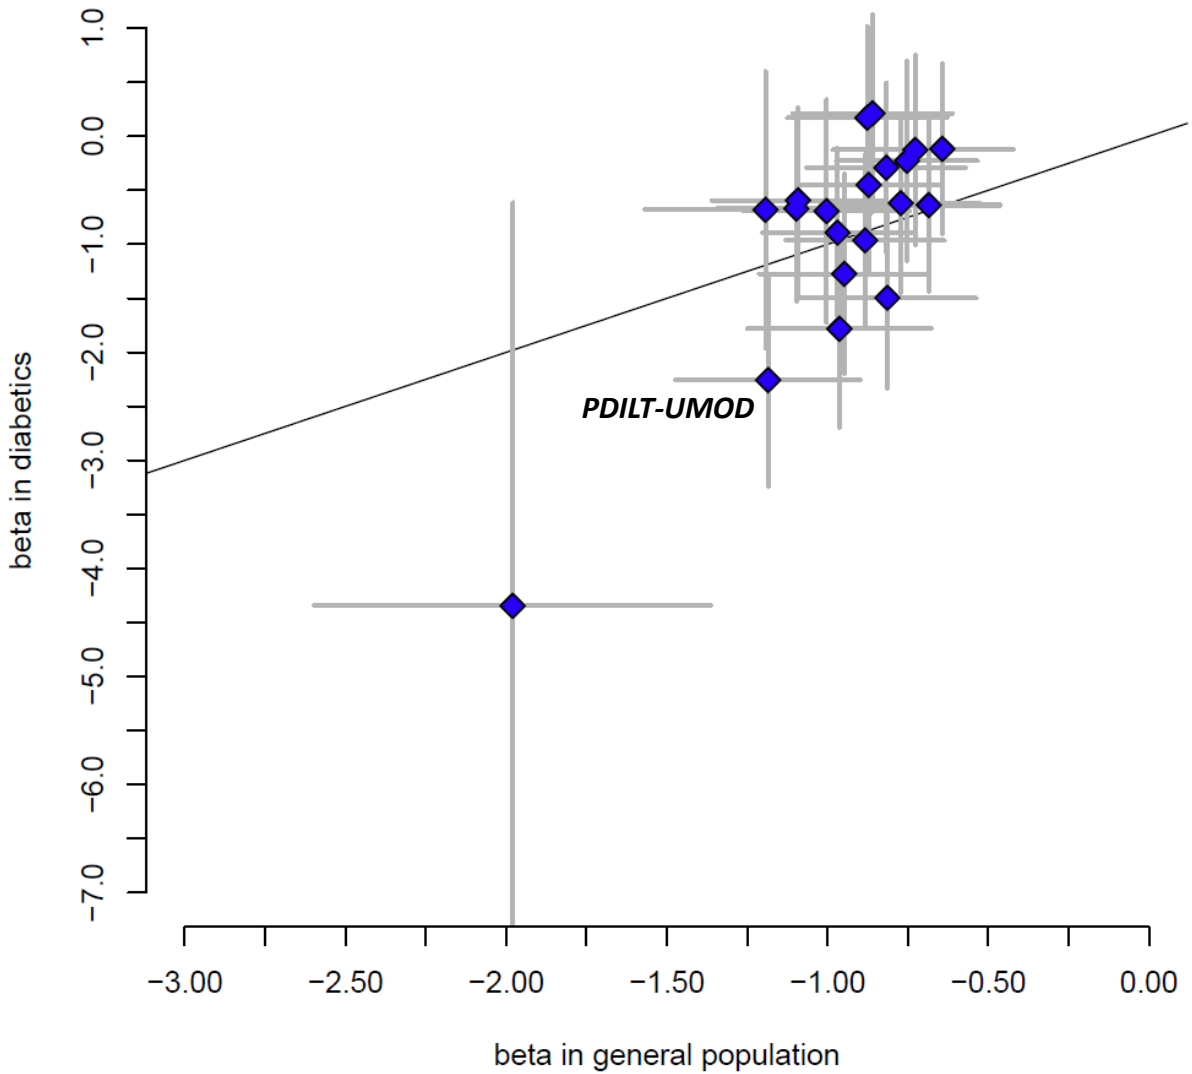

Figure S4. Enrichment of genomic annotations of regulatory chromatin state for 93 cell types, DHS for 145 cell types, and chromatin immuno-precipitation sequence binding sites for 165 transcription factors for Bayes' factors in favour of eGFR association. Each point corresponds to an annotation, plotted according to the effect size (log-enrichment in Bayes' factor) on the x-axis, and ranked according to the significance of the association on the y-axis. Significant enrichments are highlighted in red.

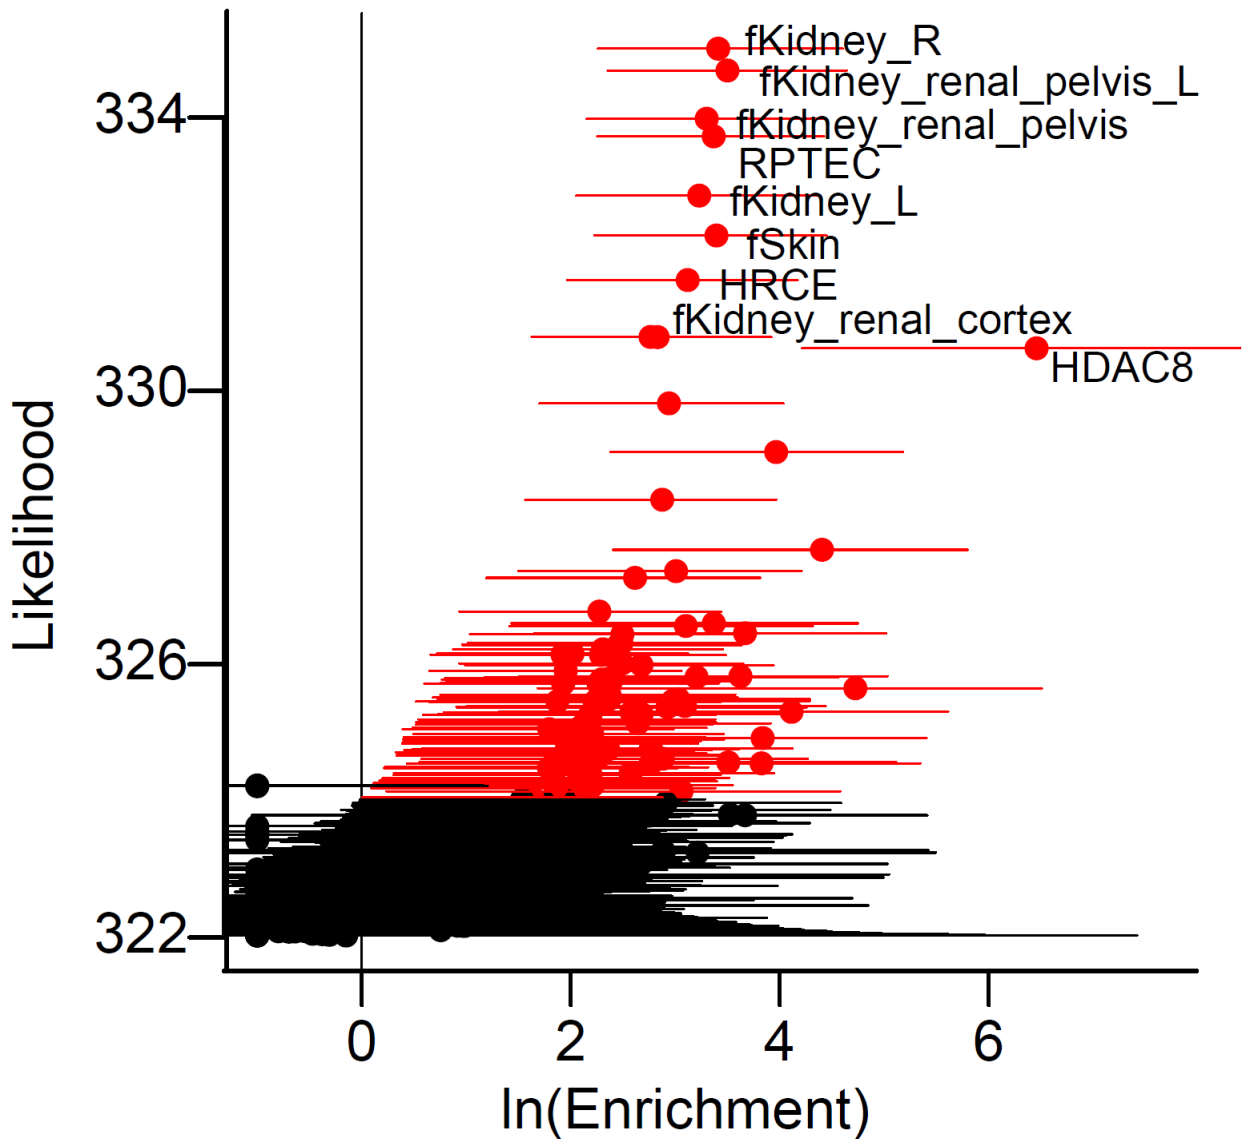

**Figure S5. Overlap of credible set variants with enriched regulatory annotations at the *SLC34A1* and *NFATC1* loci.** Each point corresponds to a SNP, plotted according to their chromosomal position and posterior probability of driving the eGFR association signal. The locations of enriched regulatory annotations (DHS in multiple kidney cell-types and TFBS for HDAC8) are highlighted for each locus.

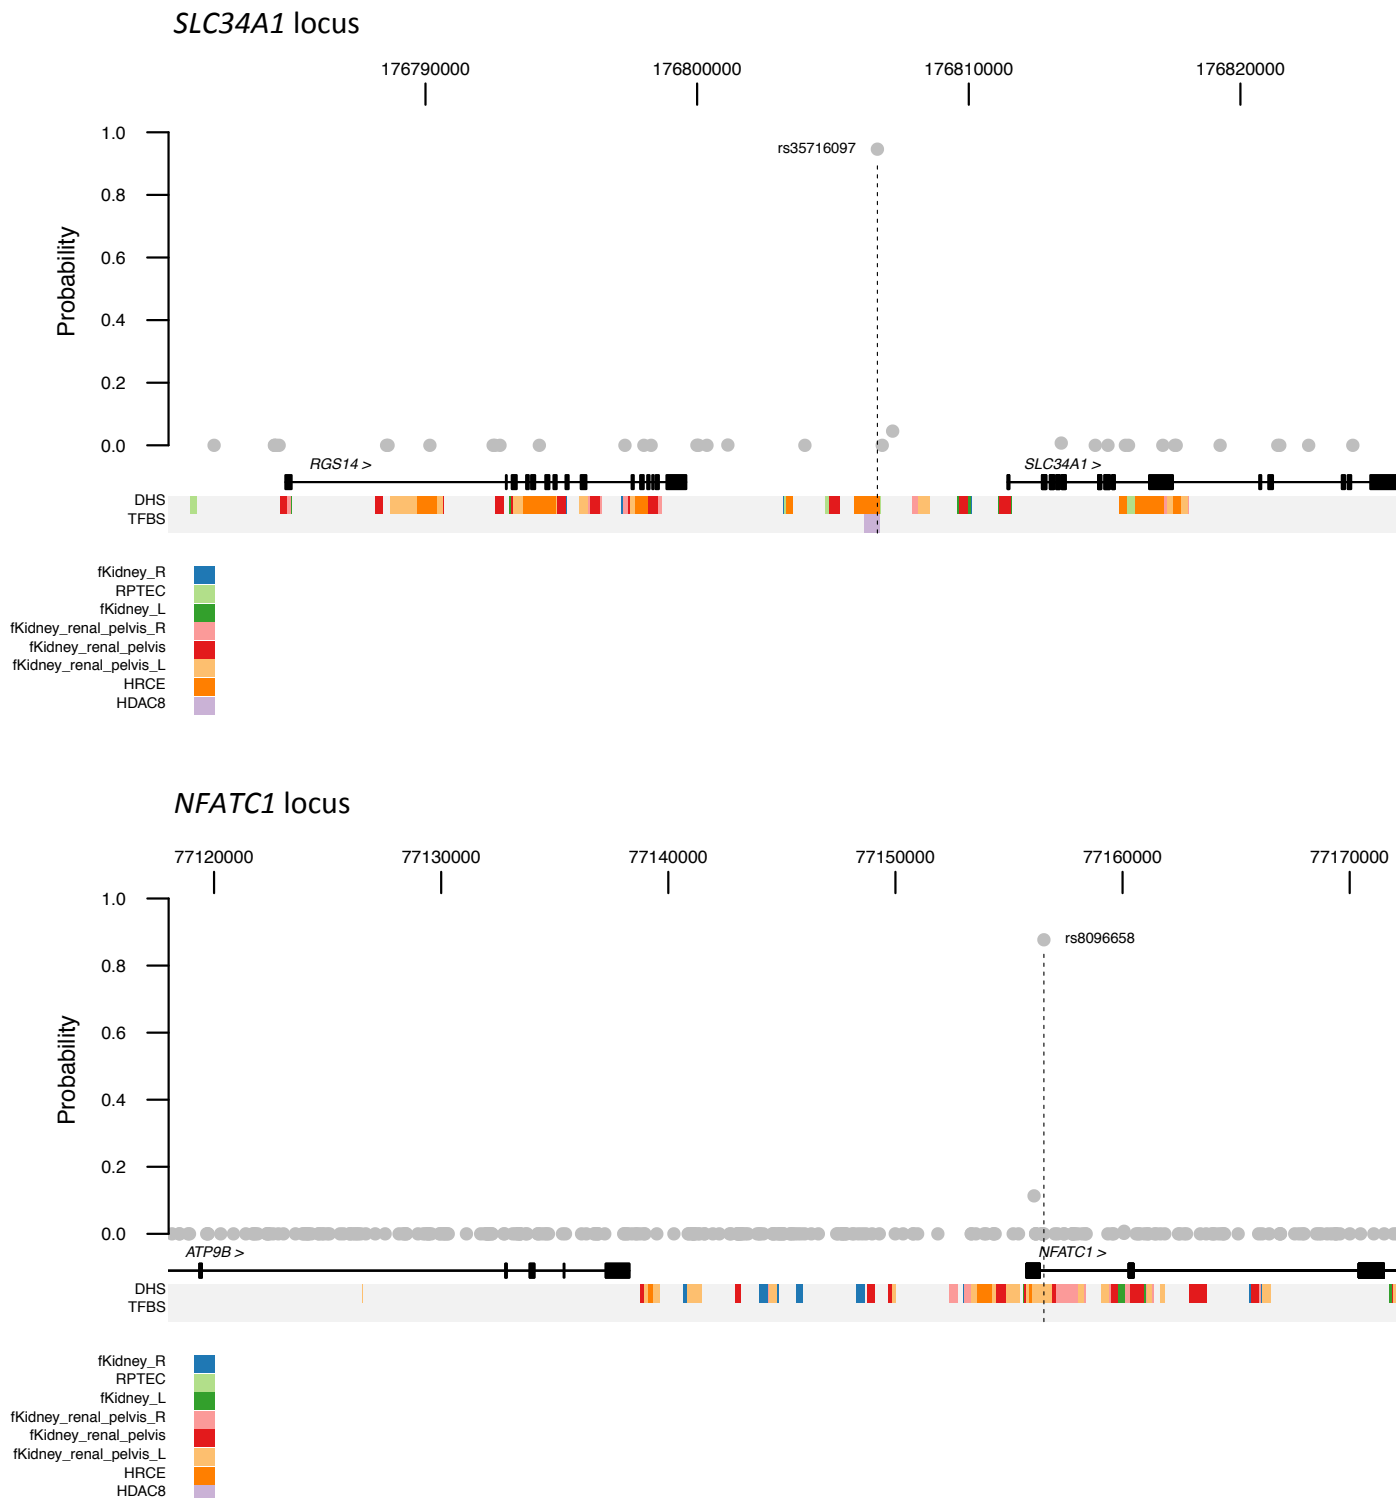

**Table S1. Study sample characteristics.**

| Study (acronym)                                                                                           | Ethnicity (origin)     | Sex     | Sample characteristics |                       |                                    |                |                    |
|-----------------------------------------------------------------------------------------------------------|------------------------|---------|------------------------|-----------------------|------------------------------------|----------------|--------------------|
|                                                                                                           |                        |         | Sample size            | Age (years) mean (SD) | Serum Creatinine (mg/dL) mean (SD) | eGFR mean (SD) | CKD cases/controls |
| Prospective Investigation of the Vasculature in Uppsala Seniors (PIVUS)                                   | European (Sweden)      | Males   | 471                    | 70.1 (0.1)            | 0.99 (0.22)                        | 83.8 (19.9)    | 136/808            |
|                                                                                                           |                        | Females | 473                    | 70.2 (0.2)            | 0.82 (0.18)                        | 77.9 (20.2)    |                    |
| Uppsala Longitudinal Study of Adult Men (ULSAM)                                                           | European (Sweden)      | Males   | 1,080                  | 71.0 (0.6)            | 1.06 (0.15)                        | 75.2 (11.3)    | 88/992             |
|                                                                                                           |                        | Females | 0                      | N/A                   | N/A                                | N/A            |                    |
| Australian Twin-Family Studies (AUSTWIN)                                                                  | European (Australia)   | Males   | 4,662                  | 48.7 (13.1)           | 1.13 (0.20)                        | 76.6 (15.8)    | NA/NA              |
|                                                                                                           |                        | Females | 7,096                  | 46.9 (13.4)           | 0.90 (0.16)                        | 75.1 (16.5)    |                    |
| Women's Health Initiative Memory Study (WHI-MS)                                                           | European (USA)         | Males   | 0                      | N/A                   | N/A                                | N/A            | 343/5,312          |
|                                                                                                           |                        | Females | 5,655                  | 68.1 (5.9)            | 0.75 (0.15)                        | 85.6 (17.8)    |                    |
| Women's Health Initiative Genome-wide Association Research Network into Effects of Treatment (WHI-GARNET) | European (USA)         | Males   | 0                      | N/A                   | N/A                                | N/A            | 240/3,876          |
|                                                                                                           |                        | Females | 4,116                  | 65.6 (6.9)            | 0.74 (0.15)                        | 88.1 (19.3)    |                    |
| BioBank Japan Project (BBJ)                                                                               | East Asian (Japan)     | Males   | 12,802                 | 64.4 (9.8)            | 0.89 (0.29)                        | 100.2 (28.5)   | 1,330/22,206       |
|                                                                                                           |                        | Females | 10,734                 | 60.7 (13.1)           | 0.64 (0.20)                        | 109.1 (31.0)   |                    |
| Hispanic Community Health Study and Study of Latinos (HCHS/SOL)                                           | Hispanic (USA)         | Males   | 5,242                  | 45.3 (14.2)           | 0.98 (0.44)                        | 95.5 (22.3)    | 462/12,314         |
|                                                                                                           |                        | Females | 7,534                  | 46.7 (13.6)           | 0.73 (0.23)                        | 96.6 (23.4)    |                    |
| Women's Health Initiative SNP Health Association Resource (WHI-SHARe)                                     | Hispanic (USA)         | Males   | 0                      | N/A                   | N/A                                | N/A            | 174/3,375          |
|                                                                                                           |                        | Females | 3,549                  | 60.3 (6.7)            | 0.71 (0.19)                        | 94.7 (21.9)    |                    |
|                                                                                                           | African American (USA) | Males   | 0                      | N/A                   | N/A                                | N/A            | 1,203/7,021        |
|                                                                                                           |                        | Females | 8,224                  | 61.6 (7.0)            | 0.82 (0.22)                        | 80.1 (19.4)    |                    |

SD: standard deviation.

**Table S2. Summary of study-specific genotyping, quality control, imputation and analysis.**

| Study acronym                | Genotyping array                                                 | Sample quality control |                                                           | Scaffold quality control |           |      | Pre-phasing and imputation |                 |             | Association analysis |                                          |                |
|------------------------------|------------------------------------------------------------------|------------------------|-----------------------------------------------------------|--------------------------|-----------|------|----------------------------|-----------------|-------------|----------------------|------------------------------------------|----------------|
|                              |                                                                  | Call rate              | Exclusions                                                | Call rate                | HWE $p$   | MAF  | Software                   | Quality filter  | Passed SNPs | Software             | Covariates                               | $\lambda_{GC}$ |
| PIVUS                        | Illumina OmniExpress & Metabochip                                | 95%                    | Heterozygosity, gender check and relatedness              | 95% (99% if MAF<5%)      | $10^{-6}$ | 1%   | SHAPEITv2<br>IMPUTEv2      | info $\geq$ 0.4 | 9,316,737   | SNPTESTv2            | Age, sex, 2 PCs                          | 0.982          |
| ULSAM                        | Illumina Omni2.5M & Metabochip                                   | 95%                    | Heterozygosity, gender check and relatedness              | 95% (99% if MAF<5%)      | $10^{-6}$ | 1%   | SHAPEITv2<br>IMPUTEv2      | info $\geq$ 0.4 | 9,388,420   | SNPTESTv2            | Age, 2 PCs                               | 1.013          |
| AUSTWIN                      | Illumina 317K, 370K, 610K, OmniExpress, Omni2.5 & HumanCoreExome | 95%                    | Heterozygosity, gender check and relatedness              | 95%                      | $10^{-6}$ | 1%   | MaCH<br>minimac            | $r^2\geq$ 0.3   | 8,584,822   | MERLIN               | Age, sex, sub-study, 10 PCs              | 1.120          |
| WHI-MS                       | Illumina OmniExpress-Exome                                       | None                   | Ethnic outliers, gender check, relatedness and duplicates | 97%                      | $10^{-4}$ | 1%   | Beagle<br>minimac          | $r^2\geq$ 0.3   | 8,814,333   | ProbABEL/R           | Age, centre, 10 PCs                      | 1.025          |
| WHI-GARNET                   | Illumina Human Omni1-Quad                                        | None                   | Ethnic outliers, gender check, relatedness and duplicates | 98%                      | $10^{-4}$ | None | Beagle<br>minimac          | $r^2\geq$ 0.3   | 8,864,693   | ProbABEL/R           | Age, centre, 10 PCs                      | 1.018          |
| BBJ                          | Illumina HumanHap 610-Quad                                       | 98%                    | Ethnic outliers and relatedness                           | 99%                      | $10^{-7}$ | 1%   | MaCH<br>minimac            | $r^2\geq$ 0.5   | 6,581,000   | mach2qtl             | None                                     | 1.058          |
| HCHS/SOL                     | Illumina Omni2.5M & custom                                       | 98%                    | Gender check and duplicates                               | 98%                      | $10^{-5}$ | None | SHAPEITv2<br>IMPUTEv2      | info $\geq$ 0.4 | 11,374,299  | LMM-OPS <sup>a</sup> | Age, sex, centre, sampling weights, 5PCs | 1.006          |
| WHI-SHARe (Hispanic)         | Affymetrix 6.0                                                   | 95%                    | Ethnic outliers, gender check, relatedness and duplicates | 95%                      | $10^{-6}$ | 1%   | MaCH                       | $r^2\geq$ 0.3   | 10,025,812  | ProbABEL             | Age, centre, 10 PCs                      | 1.027          |
| WHI-SHARe (African American) | Affymetrix 6.0                                                   | 95%                    | Ethnic outliers, gender check, relatedness and duplicates | 95%                      | $10^{-6}$ | 1%   | MaCH                       | $r^2\geq$ 0.3   | 15,345,552  | ProbABEL             | Age, centre, 10 PCs                      | 1.033          |

HWE: Hardy-Weinberg equilibrium. MAF: minor allele frequency. PC: principal component.

<sup>a</sup>In-house software, not yet publicly available; accounts for relatedness in linear mixed model.



**Table S3. Real-time RT-PCR, oligonucleotide primers.**

| <b>Gene</b>   | <b>Primer Sequence</b>                                                        |
|---------------|-------------------------------------------------------------------------------|
| <i>Rgs14</i>  | Forward: 5'-TGAGCCCAGTGAACATCGAC -3'<br>Reverse: 5'- TGTGCTCGGAACATATCTGGC-3' |
| <i>Nfatc1</i> | Forward: 5'-TGCCTTTTGCAGCAGTATCT-3'<br>Reverse: 5'-CAGGCAAGGATGGGCTCATAT-3'   |

**Table S4. Association summary statistics for eGFR at previously reported lead SNPs in established loci in trans-ethnic meta-analysis of 71,638 individuals.**

| Locus                     | SNP        | Chr | Position<br>(bp, b37) | Alleles             |       | Association summary statistics |       |                       |        | Reference                                 |
|---------------------------|------------|-----|-----------------------|---------------------|-------|--------------------------------|-------|-----------------------|--------|-------------------------------------------|
|                           |            |     |                       | Effect <sup>a</sup> | Other | Beta                           | SE    | p-value               | N      |                                           |
| <i>CASP9</i>              | rs12124078 | 1   | 15,869,899            | G                   | A     | -0.437                         | 0.115 | 0.00019               | 71,636 | Pattaro <i>et al.</i> (2012) <sup>5</sup> |
| <i>SYPL2</i>              | rs12136063 | 1   | 110,014,170           | G                   | A     | -0.172                         | 0.148 | 0.25                  | 61,867 | Pattaro <i>et al.</i> (2016) <sup>8</sup> |
| <i>LASS2</i>              | rs267734   | 1   | 150,951,477           | T                   | C     | -0.311                         | 0.158 | 0.052                 | 71,638 | Kottgen <i>et al.</i> (2010) <sup>4</sup> |
| <i>CACNA1S</i>            | rs3850625  | 1   | 201,016,296           | G                   | A     | -0.795                         | 0.207 | 0.00016               | 71,638 | Pattaro <i>et al.</i> (2016) <sup>8</sup> |
| <i>SDCCAG8</i>            | rs2802729  | 1   | 243,501,763           | A                   | C     | -0.323                         | 0.118 | 0.0068                | 71,638 | Pattaro <i>et al.</i> (2016) <sup>8</sup> |
| <i>DDX1</i>               | rs6431731  | 2   | 15,863,002            | T                   | C     | -0.456                         | 0.322 | 0.16                  | 48,102 | Pattaro <i>et al.</i> (2012) <sup>5</sup> |
| <i>GCKR</i>               | rs1260326  | 2   | 27,730,940            | C                   | T     | -0.872                         | 0.114 | 6.1x10 <sup>-14</sup> | 71,638 | Kottgen <i>et al.</i> (2010) <sup>4</sup> |
| <i>ALMS1</i>              | rs13538    | 2   | 73,868,328            | A                   | G     | -0.920                         | 0.140 | 9.2x10 <sup>-11</sup> | 48,102 | Kottgen <i>et al.</i> (2010) <sup>4</sup> |
| <i>LRP2</i>               | rs4667594  | 2   | 170,008,506           | A                   | T     | -0.263                         | 0.115 | 0.025                 | 71,637 | Pattaro <i>et al.</i> (2016) <sup>8</sup> |
| <i>CPS1</i>               | rs7422339  | 2   | 211,540,507           | A                   | C     | -0.771                         | 0.125 | 1.2x10 <sup>-9</sup>  | 71,638 | Kottgen <i>et al.</i> (2010) <sup>4</sup> |
| <i>IGFBP5</i>             | rs2712184  | 2   | 217,682,779           | A                   | C     | -0.573                         | 0.114 | 7.6x10 <sup>-7</sup>  | 65,983 | Pattaro <i>et al.</i> (2016) <sup>8</sup> |
| <i>WNT7A</i>              | rs6795744  | 3   | 13,906,850            | G                   | A     | -0.159                         | 0.156 | 0.32                  | 71,638 | Pattaro <i>et al.</i> (2016) <sup>8</sup> |
| <i>TFDP2</i>              | rs347685   | 3   | 141,807,137           | A                   | C     | -0.637                         | 0.123 | 3.0x10 <sup>-7</sup>  | 71,638 | Kottgen <i>et al.</i> (2010) <sup>4</sup> |
| <i>SKIL</i>               | rs9682041  | 3   | 170,091,902           | T                   | C     | -0.141                         | 0.159 | 0.38                  | 71,638 | Pattaro <i>et al.</i> (2016) <sup>8</sup> |
| <i>ETV5</i>               | rs10513801 | 3   | 185,822,353           | G                   | T     | -0.341                         | 0.194 | 0.083                 | 71,638 | Pattaro <i>et al.</i> (2016) <sup>8</sup> |
| <i>SHROOM3</i>            | rs17319721 | 4   | 77,368,847            | A                   | G     | -0.815                         | 0.120 | 2.2x10 <sup>-11</sup> | 71,638 | Kottgen <i>et al.</i> (2010) <sup>4</sup> |
| <i>NFKB1</i>              | rs228611   | 4   | 103,561,709           | A                   | G     | -0.351                         | 0.124 | 0.0052                | 48,101 | Pattaro <i>et al.</i> (2016) <sup>8</sup> |
| <i>DAB2-C9</i>            | rs11959928 | 5   | 39,397,132            | A                   | T     | -0.719                         | 0.113 | 4.1x10 <sup>-10</sup> | 71,638 | Kottgen <i>et al.</i> (2010) <sup>4</sup> |
| <i>SLC34A1</i>            | rs6420094  | 5   | 176,817,636           | G                   | A     | -0.804                         | 0.123 | 1.1x10 <sup>-10</sup> | 71,638 | Kottgen <i>et al.</i> (2010) <sup>4</sup> |
| <i>ZNF204</i>             | rs7759001  | 6   | 27,341,409            | A                   | G     | -0.233                         | 0.138 | 0.099                 | 61,867 | Pattaro <i>et al.</i> (2016) <sup>8</sup> |
| MHC region                | rs3828890  | 6   | 31,440,669            | C                   | G     | -0.089                         | 0.194 | 0.65                  | 59,865 | Okada <i>et al.</i> (2012) <sup>6</sup>   |
| <i>LOC100132354-VEGFA</i> | rs881858   | 6   | 43,806,609            | A                   | G     | -0.772                         | 0.127 | 2.0x10 <sup>-9</sup>  | 71,638 | Kottgen <i>et al.</i> (2010) <sup>4</sup> |
| <i>SLC22A2</i>            | rs2279463  | 6   | 160,668,389           | G                   | A     | -0.905                         | 0.169 | 1.4x10 <sup>-7</sup>  | 71,638 | Kottgen <i>et al.</i> (2010) <sup>4</sup> |
| <i>UNCX</i>               | rs10277115 | 7   | 1,285,195             | T                   | A     | -1.089                         | 0.141 | 3.3x10 <sup>-14</sup> | 59,865 | Okada <i>et al.</i> (2012) <sup>6</sup>   |
| <i>KBTBD2</i>             | rs3750082  | 7   | 32,919,927            | T                   | A     | -0.441                         | 0.118 | 0.00025               | 71,638 | Pattaro <i>et al.</i> (2016) <sup>8</sup> |
| <i>PHTF2</i>              | rs6465825  | 7   | 77,416,439            | C                   | T     | -0.590                         | 0.125 | 3.4x10 <sup>-6</sup>  | 61,867 | Kottgen <i>et al.</i> (2010) <sup>4</sup> |
| <i>PRKAG2</i>             | rs7805747  | 7   | 151,407,801           | A                   | G     | -0.813                         | 0.136 | 4.4x10 <sup>-9</sup>  | 48,102 | Kottgen <i>et al.</i> (2010) <sup>4</sup> |
| <i>RNF32</i>              | rs6459680  | 7   | 156,258,568           | T                   | G     | -0.315                         | 0.120 | 0.0097                | 71,638 | Pattaro <i>et al.</i> (2016) <sup>8</sup> |
| <i>STC1</i>               | rs10109414 | 8   | 23,751,151            | T                   | C     | -0.605                         | 0.116 | 2.5x10 <sup>-7</sup>  | 71,637 | Kottgen <i>et al.</i> (2010) <sup>4</sup> |
| <i>PIP5K1B</i>            | rs4744712  | 9   | 71,434,707            | A                   | C     | -0.753                         | 0.112 | 3.3x10 <sup>-11</sup> | 71,638 | Kottgen <i>et al.</i> (2010) <sup>4</sup> |

|               |            |    |            |   |   |        |       |                       |        |                                           |
|---------------|------------|----|------------|---|---|--------|-------|-----------------------|--------|-------------------------------------------|
| WDR37         | rs10794720 | 10 | 1,156,165  | T | C | -0.664 | 0.182 | 0.00033               | 71,638 | Kottgen <i>et al.</i> (2010) <sup>4</sup> |
| A1CF          | rs10994860 | 10 | 52,645,424 | C | T | -0.322 | 0.177 | 0.072                 | 61,866 | Pattaro <i>et al.</i> (2016) <sup>8</sup> |
| KCNQ1         | rs163160   | 11 | 2,789,955  | G | A | -0.557 | 0.148 | 0.00021               | 71,638 | Pattaro <i>et al.</i> (2016) <sup>8</sup> |
| DCDC5-MPPED2  | rs3925584  | 11 | 30,760,335 | T | C | -0.647 | 0.121 | 1.5x10 <sup>-7</sup>  | 65,983 | Pattaro <i>et al.</i> (2012) <sup>5</sup> |
| AP5B1         | rs4014195  | 11 | 65,506,822 | G | C | -0.289 | 0.122 | 0.021                 | 71,638 | Pattaro <i>et al.</i> (2016) <sup>8</sup> |
| SLC6A13       | rs10774021 | 12 | 349,298    | T | C | -0.477 | 0.112 | 2.9x10 <sup>-5</sup>  | 71,638 | Kottgen <i>et al.</i> (2010) <sup>4</sup> |
| TSPAN9        | rs10491967 | 12 | 3,368,093  | A | G | -0.398 | 0.148 | 0.0080                | 61,867 | Pattaro <i>et al.</i> (2016) <sup>8</sup> |
| PTPRO         | rs7956634  | 12 | 15,321,194 | T | C | -0.426 | 0.125 | 0.00076               | 71,638 | Pattaro <i>et al.</i> (2016) <sup>8</sup> |
| INHBC         | rs1106766  | 12 | 57,809,456 | C | T | -0.233 | 0.137 | 0.095                 | 71,637 | Pattaro <i>et al.</i> (2016) <sup>8</sup> |
| DACH1         | rs626277   | 13 | 72,347,696 | A | C | -0.428 | 0.116 | 0.00027               | 71,638 | Kottgen <i>et al.</i> (2010) <sup>4</sup> |
| INO80         | rs2928148  | 15 | 41,401,550 | G | A | -0.278 | 0.113 | 0.016                 | 71,638 | Pattaro <i>et al.</i> (2012) <sup>5</sup> |
| SPATA5L1-GATM | rs2453533  | 15 | 45,641,225 | A | C | -0.849 | 0.124 | 1.8x10 <sup>-11</sup> | 71,638 | Kottgen <i>et al.</i> (2010) <sup>4</sup> |
| WDR72         | rs491567   | 15 | 53,946,593 | A | C | -0.639 | 0.120 | 1.4x10 <sup>-7</sup>  | 71,638 | Kottgen <i>et al.</i> (2010) <sup>4</sup> |
| UBE2Q2        | rs1394125  | 15 | 76,158,983 | A | G | -0.442 | 0.126 | 0.00052               | 71,638 | Kottgen <i>et al.</i> (2010) <sup>4</sup> |
| PDILT-UMOD    | rs12917707 | 16 | 20,367,690 | G | T | -1.050 | 0.169 | 8.8x10 <sup>-10</sup> | 48,102 | Kottgen <i>et al.</i> (2010) <sup>4</sup> |
| DPEP1         | rs164748   | 16 | 89,708,292 | G | C | -0.593 | 0.131 | 8.4x10 <sup>-6</sup>  | 71,637 | Pattaro <i>et al.</i> (2016) <sup>8</sup> |
| SLC47A1       | rs2453580  | 17 | 19,438,321 | C | T | -0.314 | 0.126 | 0.014                 | 71,638 | Pattaro <i>et al.</i> (2012) <sup>5</sup> |
| CDK12         | rs11078903 | 17 | 37,631,924 | A | G | -0.564 | 0.125 | 8.6x10 <sup>-6</sup>  | 71,638 | Pattaro <i>et al.</i> (2012) <sup>5</sup> |
| BCAS3         | rs9895661  | 17 | 59,456,589 | C | T | -1.003 | 0.132 | 7.9x10 <sup>-14</sup> | 71,638 | Kottgen <i>et al.</i> (2010) <sup>4</sup> |
| NFATC1        | rs8091180  | 18 | 77,164,243 | A | G | -0.415 | 0.131 | 0.0018                | 59,864 | Pattaro <i>et al.</i> (2016) <sup>8</sup> |
| SLC7A9        | rs12460786 | 19 | 20,977,663 | T | C | -0.030 | 0.117 | 0.80                  | 71,638 | Kottgen <i>et al.</i> (2010) <sup>4</sup> |
| SIPA1L3       | rs11666497 | 19 | 38,464,262 | T | C | -0.119 | 0.157 | 0.46                  | 71,638 | Pattaro <i>et al.</i> (2016) <sup>8</sup> |
| TP53INP2      | rs6088580  | 20 | 33,285,053 | C | G | -0.192 | 0.112 | 0.091                 | 71,638 | Pattaro <i>et al.</i> (2016) <sup>8</sup> |
| BCAS1         | rs17216707 | 20 | 52,732,362 | T | C | -0.761 | 0.150 | 5.7x10 <sup>-7</sup>  | 71,638 | Pattaro <i>et al.</i> (2016) <sup>8</sup> |

Chr: chromosome. SE: standard error.

<sup>a</sup>Effect allele is eGFR decreasing allele.

**Table S5. Ancestry-specific association summary statistics for eGFR for lead SNPs from the trans-ethnic meta-analysis of 71,638 individuals.**

| Locus              | Lead SNP        | Chr | Position (bp, b37) | Alleles |       | Ancestry group | Ancestry-specific association statistics |        |       |                       |        |
|--------------------|-----------------|-----|--------------------|---------|-------|----------------|------------------------------------------|--------|-------|-----------------------|--------|
|                    |                 |     |                    | Effect  | Other |                | EAF                                      | Beta   | SE    | p-value               | N      |
| GCKR               | rs1260326       | 2   | 27,730,940         | C       | T     | AFA            | 0.84                                     | -1.123 | 0.422 | 0.0078                | 8,224  |
|                    |                 |     |                    |         |       | EAS            | 0.44                                     | -0.637 | 0.262 | 0.015                 | 23,536 |
|                    |                 |     |                    |         |       | EUR            | 0.60                                     | -0.830 | 0.158 | 2.0x10 <sup>-7</sup>  | 23,553 |
|                    |                 |     |                    |         |       | HIS            | 0.66                                     | -1.098 | 0.248 | 1.1x10 <sup>-5</sup>  | 16,325 |
| ALMS1              | rs7587577       | 2   | 73,832,786         | C       | T     | AFA            | 0.48                                     | -0.894 | 0.301 | 0.0029                | 8,224  |
|                    |                 |     |                    |         |       | EAS            | N/A                                      | N/A    | N/A   | N/A                   | N/A    |
|                    |                 |     |                    |         |       | EUR            | 0.76                                     | -1.037 | 0.186 | 3.2x10 <sup>-8</sup>  | 23,553 |
|                    |                 |     |                    |         |       | HIS            | 0.73                                     | -0.813 | 0.262 | 0.0020                | 16,325 |
| LRP2               | rs57989581      | 2   | 170,194,459        | C       | A     | AFA            | 0.96                                     | -2.458 | 0.813 | 0.0025                | 8,224  |
|                    |                 |     |                    |         |       | EAS            | 0.92                                     | -1.065 | 0.461 | 0.021                 | 23,536 |
|                    |                 |     |                    |         |       | EUR            | 0.98                                     | -3.084 | 0.667 | 4.4x10 <sup>-6</sup>  | 23,553 |
|                    |                 |     |                    |         |       | HIS            | 0.98                                     | -2.658 | 0.784 | 0.00074               | 16,325 |
| CPS1               | rs715           | 2   | 211,543,055        | C       | T     | AFA            | 0.22                                     | -1.180 | 0.386 | 0.022                 | 8,224  |
|                    |                 |     |                    |         |       | EAS            | 0.16                                     | -1.406 | 0.373 | 0.00017               | 23,536 |
|                    |                 |     |                    |         |       | EUR            | 0.32                                     | -0.765 | 0.175 | 1.4x10 <sup>-5</sup>  | 23,553 |
|                    |                 |     |                    |         |       | HIS            | 0.28                                     | -0.729 | 0.259 | 0.0051                | 16,325 |
| TFDP2              | rs1511299       | 3   | 141,716,072        | T       | C     | AFA            | 0.91                                     | -1.214 | 0.523 | 0.022                 | 8,224  |
|                    |                 |     |                    |         |       | EAS            | 0.72                                     | -0.584 | 0.286 | 0.041                 | 23,536 |
|                    |                 |     |                    |         |       | EUR            | 0.74                                     | -0.746 | 0.177 | 3.0x10 <sup>-5</sup>  | 23,553 |
|                    |                 |     |                    |         |       | HIS            | 0.83                                     | -0.668 | 0.306 | 0.029                 | 16,325 |
| SHROOM3            | rs52020545      | 4   | 77,414,988         | T       | C     | AFA            | 0.26                                     | -0.410 | 0.355 | 0.25                  | 8,224  |
|                    |                 |     |                    |         |       | EAS            | 0.16                                     | -1.803 | 0.391 | 4.0x10 <sup>-6</sup>  | 23,536 |
|                    |                 |     |                    |         |       | EUR            | 0.43                                     | -1.116 | 0.161 | 6.4x10 <sup>-12</sup> | 23,553 |
|                    |                 |     |                    |         |       | HIS            | 0.36                                     | -0.579 | 0.242 | 0.017                 | 16,325 |
| DAB2-C9            | chr5:39404526:D | 5   | 39,404,526         | D       | R     | AFA            | 0.12                                     | -1.086 | 0.375 | 0.0039                | 8,224  |
|                    |                 |     |                    |         |       | EAS            | N/A                                      | N/A    | N/A   | N/A                   | N/A    |
|                    |                 |     |                    |         |       | EUR            | 0.42                                     | -0.721 | 0.160 | 7.8x10 <sup>-6</sup>  | 23,553 |
|                    |                 |     |                    |         |       | HIS            | 0.38                                     | -0.925 | 0.241 | 0.00013               | 16,325 |
| SLC43A1            | rs35716097      | 5   | 176,806,636        | T       | C     | AFA            | 0.36                                     | -0.734 | 0.393 | 0.062                 | 8,224  |
|                    |                 |     |                    |         |       | EAS            | 0.33                                     | -1.905 | 0.324 | 4.2x10 <sup>-9</sup>  | 23,536 |
|                    |                 |     |                    |         |       | EUR            | 0.30                                     | -0.897 | 0.178 | 5.8x10 <sup>-7</sup>  | 23,553 |
|                    |                 |     |                    |         |       | HIS            | 0.29                                     | -1.169 | 0.268 | 1.4x10 <sup>-5</sup>  | 16,325 |
| LOC100132354-VEGFA | rs881858        | 6   | 43,806,609         | A       | G     | AFA            | 0.41                                     | -0.335 | 0.318 | 0.29                  | 8,224  |
|                    |                 |     |                    |         |       | EAS            | 0.87                                     | -0.807 | 0.434 | 0.063                 | 23,536 |
|                    |                 |     |                    |         |       | EUR            | 0.68                                     | -0.632 | 0.175 | 0.00034               | 23,553 |
|                    |                 |     |                    |         |       | HIS            | 0.71                                     | -1.375 | 0.264 | 2.1x10 <sup>-7</sup>  | 16,325 |
| SLC22A2            | rs316009        | 6   | 160,675,764        | C       | T     | AFA            | 0.91                                     | -1.648 | 0.547 | 0.0026                | 8,224  |
|                    |                 |     |                    |         |       | EAS            | 0.95                                     | -1.777 | 0.569 | 0.0018                | 23,536 |
|                    |                 |     |                    |         |       | EUR            | 0.90                                     | -1.000 | 0.255 | 0.00010               | 23,553 |
|                    |                 |     |                    |         |       | HIS            | 0.92                                     | -1.123 | 0.437 | 0.010                 | 16,325 |
| UNCX               | rs62435145      | 7   | 1,286,567          | T       | G     | AFA            | N/A                                      | N/A    | N/A   | N/A                   | N/A    |
|                    |                 |     |                    |         |       | EAS            | 0.32                                     | -1.611 | 0.282 | 1.1x10 <sup>-8</sup>  | 23,536 |
|                    |                 |     |                    |         |       | EUR            | 0.66                                     | -0.773 | 0.197 | 0.00010               | 23,553 |
|                    |                 |     |                    |         |       | HIS            | 0.49                                     | -1.208 | 0.261 | 4.1x10 <sup>-6</sup>  | 12,776 |
| PHTF2              | rs848486        | 7   | 77,552,127         | G       | A     | AFA            | 0.53                                     | -0.665 | 0.298 | 0.026                 | 8,224  |
|                    |                 |     |                    |         |       | EAS            | 0.23                                     | -0.442 | 0.309 | 0.15                  | 23,536 |
|                    |                 |     |                    |         |       | EUR            | 0.41                                     | -0.600 | 0.160 | 0.00020               | 23,553 |
|                    |                 |     |                    |         |       | HIS            | 0.37                                     | -0.844 | 0.238 | 0.00041               | 16,325 |
| PRKAG2             | rs10265221      | 7   | 151,414,329        | C       | T     | AFA            | 0.16                                     | -1.512 | 0.506 | 0.0028                | 8,224  |
|                    |                 |     |                    |         |       | EAS            | 0.07                                     | -0.680 | 0.707 | 0.34                  | 23,536 |
|                    |                 |     |                    |         |       | EUR            | 0.29                                     | -0.850 | 0.183 | 4.2x10 <sup>-6</sup>  | 23,553 |
|                    |                 |     |                    |         |       | HIS            | 0.20                                     | -1.117 | 0.295 | 0.00016               | 16,325 |

|                      |            |    |            |   |   |     |      |        |       |                      |        |
|----------------------|------------|----|------------|---|---|-----|------|--------|-------|----------------------|--------|
| <i>PIP5K1B</i>       | rs4744712  | 9  | 71,434,707 | A | C | AFA | 0.42 | -0.828 | 0.303 | 0.0063               | 8,224  |
|                      |            |    |            |   |   | EAS | 0.38 | -0.620 | 0.264 | 0.019                | 23,536 |
|                      |            |    |            |   |   | EUR | 0.40 | -0.669 | 0.158 | 2.7x10 <sup>-5</sup> | 23,553 |
|                      |            |    |            |   |   | HIS | 0.28 | -1.055 | 0.261 | 5.7x10 <sup>-5</sup> | 16,325 |
| <i>DCDC5-MPPED2</i>  | rs963837   | 11 | 30,749,090 | T | C | AFA | 0.85 | -0.365 | 0.453 | 0.42                 | 8,224  |
|                      |            |    |            |   |   | EAS | 0.65 | -0.989 | 0.268 | 0.00023              | 23,536 |
|                      |            |    |            |   |   | EUR | 0.55 | -0.572 | 0.158 | 0.00032              | 23,553 |
|                      |            |    |            |   |   | HIS | 0.60 | 0.79   | 0.239 | 0.0010               | 16,325 |
| <i>SPATA5L1-GATM</i> | rs2486288  | 15 | 45,712,339 | C | T | AFA | 0.82 | -1.057 | 0.405 | 0.0090               | 8,224  |
|                      |            |    |            |   |   | EAS | 0.94 | -0.497 | 0.543 | 0.36                 | 23,536 |
|                      |            |    |            |   |   | EUR | 0.38 | -0.923 | 0.162 | 1.5x10 <sup>-8</sup> | 23,553 |
|                      |            |    |            |   |   | HIS | 0.63 | -0.801 | 0.255 | 0.0018               | 16,325 |
| <i>WDR72</i>         | rs1031755  | 15 | 53,951,435 | A | C | AFA | 0.82 | -0.966 | 0.390 | 0.013                | 8,224  |
|                      |            |    |            |   |   | EAS | 0.60 | -1.463 | 0.263 | 2.8x10 <sup>-8</sup> | 23,536 |
|                      |            |    |            |   |   | EUR | 0.79 | -0.963 | 0.193 | 7.0x10 <sup>-7</sup> | 23,553 |
|                      |            |    |            |   |   | HIS | 0.70 | -0.016 | 0.263 | 0.95                 | 16,325 |
| <i>PDILT-UMOD</i>    | rs77924615 | 16 | 20,392,332 | G | A | AFA | 0.92 | -0.446 | 0.651 | 0.49                 | 8,224  |
|                      |            |    |            |   |   | EAS | 0.78 | -1.589 | 0.314 | 4.2x10 <sup>-7</sup> | 23,536 |
|                      |            |    |            |   |   | EUR | 0.80 | -1.300 | 0.213 | 1.5x10 <sup>-9</sup> | 23,553 |
|                      |            |    |            |   |   | HIS | 0.80 | -0.779 | 0.289 | 0.0072               | 16,325 |
| <i>BCAS3</i>         | rs9895661  | 17 | 59,456,589 | C | T | AFA | 0.45 | -0.569 | 0.301 | 0.059                | 8,224  |
|                      |            |    |            |   |   | EAS | 0.53 | -1.491 | 0.309 | 1.4x10 <sup>-6</sup> | 23,536 |
|                      |            |    |            |   |   | EUR | 0.20 | -0.851 | 0.231 | 0.00026              | 23,553 |
|                      |            |    |            |   |   | HIS | 0.45 | -1.148 | 0.243 | 2.5x10 <sup>-6</sup> | 16,325 |
| <i>NFATC1</i>        | rs8096658  | 18 | 77,156,537 | G | C | AFA | N/A  | N/A    | N/A   | N/A                  | N/A    |
|                      |            |    |            |   |   | EAS | 0.29 | -0.856 | 0.308 | 0.0054               | 23,536 |
|                      |            |    |            |   |   | EUR | 0.47 | -0.632 | 0.196 | 0.0014               | 23,553 |
|                      |            |    |            |   |   | HIS | 0.43 | -1.124 | 0.270 | 3.4x10 <sup>-5</sup> | 12,776 |

Chr: chromosome. EAF: effect allele frequency. SE: standard error. AFA: African American. EAS: East Asian. EUR: European. HIS: Hispanic.

**Table S6. Residual association signals for eGFR from the trans-ethnic meta-analysis of 71,638 individuals at each locus after adjusting for the lead SNP.**

| Locus                     | Index SNP <sup>a</sup> | Chr | Pos<br>(bp, b37) | Alleles             |       | Unconditional meta-analysis |       |                      | Conditional meta-analysis |       |                      |
|---------------------------|------------------------|-----|------------------|---------------------|-------|-----------------------------|-------|----------------------|---------------------------|-------|----------------------|
|                           |                        |     |                  | Effect <sup>b</sup> | Other | Beta                        | SE    | p-value              | Beta                      | SE    | p-value              |
| <i>GCKR</i>               | rs113778329            | 2   | 27,896,643       | G                   | A     | -0.608                      | 0.383 | 0.12                 | -1.332                    | 0.447 | 0.0029               |
| <i>ALMS1</i>              | rs12998058             | 2   | 73,511,468       | G                   | A     | -0.125                      | 0.172 | 0.47                 | -0.717                    | 0.173 | 3.3x10 <sup>-5</sup> |
| <i>LRP2</i>               | rs74648148             | 2   | 169,774,784      | G                   | C     | -0.742                      | 0.336 | 0.029                | -1.114                    | 0.382 | 0.0035               |
| <i>CPS1</i>               | rs9917188              | 2   | 211,904,894      | T                   | A     | -0.552                      | 0.249 | 0.029                | -0.910                    | 0.251 | 0.00028              |
| <i>TFDP2</i>              | rs58623354             | 3   | 141,550,696      | T                   | G     | -0.313                      | 0.144 | 0.032                | -0.548                    | 0.145 | 0.00017              |
| <i>SHROOM3</i>            | rs62300863             | 4   | 77,399,651       | C                   | T     | -0.697                      | 0.152 | 6.4x10 <sup>-6</sup> | -0.543                    | 0.161 | 0.00075              |
| <i>DAB2-C9</i>            | rs117574694            | 5   | 39,762,051       | G                   | T     | 1.183                       | 0.337 | 0.00053              | -1.113                    | 0.330 | 0.00074              |
| <i>SLC34A1</i>            | rs72813176             | 5   | 176,709,333      | A                   | G     | 0.145                       | 0.248 | 0.57                 | -0.585                    | 0.253 | 0.021                |
| <i>LOC100132354-VEGFA</i> | rs111451988            | 6   | 43,566,036       | G                   | A     | -0.638                      | 0.305 | 0.040                | -1.060                    | 0.308 | 0.00058              |
| <i>SLC22A2</i>            | rs2665355              | 6   | 160,837,368      | G                   | C     | 0.120                       | 0.109 | 0.28                 | -0.401                    | 0.110 | 0.00026              |
| <i>UNCX</i>               | rs10282027             | 7   | 1,005,018        | A                   | G     | -0.747                      | 0.316 | 0.020                | -1.047                    | 0.317 | 0.00095              |
| <i>PHTF2</i>              | rs151202634            | 7   | 77,811,782       | G                   | A     | -1.495                      | 0.525 | 0.0050               | -1.585                    | 0.513 | 0.0020               |
| <i>PRKAG2</i>             | rs6464171              | 7   | 151,505,876      | C                   | G     | -0.099                      | 0.127 | 0.44                 | -0.388                    | 0.127 | 0.0023               |
| <i>PIP5K1B</i>            | rs75852340             | 9   | 71,164,514       | C                   | G     | -1.916                      | 0.564 | 0.00081              | -1.877                    | 0.661 | 0.0046               |
| <i>DCDC5-MPPED2</i>       | rs1813133              | 11  | 31,243,672       | C                   | T     | -0.523                      | 0.340 | 0.13                 | -1.191                    | 0.344 | 0.00054              |
| <i>SPATA5L1-GATM</i>      | rs140661904            | 15  | 46,041,594       | A                   | T     | -1.567                      | 0.441 | 0.00047              | -1.551                    | 0.536 | 0.0038               |
| <i>WDR72</i>              | rs1878189              | 15  | 53,786,594       | C                   | G     | -1.015                      | 0.282 | 0.00040              | -1.108                    | 0.302 | 0.00025              |
| <i>PDILT-UMOD</i>         | rs9928757              | 16  | 20,352,863       | G                   | C     | -1.012                      | 0.165 | 1.5x10 <sup>-9</sup> | -0.677                    | 0.180 | 0.00018              |
| <i>BCAS3</i>              | rs79068244             | 17  | 59,217,958       | C                   | T     | 1.542                       | 0.389 | 9.3x10 <sup>-5</sup> | -1.629                    | 0.380 | 1.8x10 <sup>-5</sup> |
| <i>NFATC1</i>             | rs526317               | 18  | 77,546,641       | A                   | G     | -0.676                      | 0.198 | 0.00077              | -0.549                    | 0.186 | 0.0032               |

Chr: chromosome. SE: standard error.

<sup>a</sup>Index SNP has strongest residual signal of association across the locus in trans-ethnic meta-analysis after adjusting for lead SNP.

<sup>b</sup>Effect allele is eGFR decreasing allele in conditional meta-analysis.

**Table S7. Association summary statistics for CKD at lead eGFR SNPs from the trans-ethnic meta-analysis of up to 3,976 cases and 55,904 controls.**

| Locus                     | Lead eGFR SNP   | Chr | Position (bp, b37) | Alleles             |       | CKD association summary statistics |                      |                     | Sample size: cases/controls |
|---------------------------|-----------------|-----|--------------------|---------------------|-------|------------------------------------|----------------------|---------------------|-----------------------------|
|                           |                 |     |                    | Effect <sup>a</sup> | Other | OR (95% CI)                        | p-value              | Cochran's Q p-value |                             |
| <i>GCKR</i>               | rs1260326       | 2   | 27,730,940         | C                   | T     | 1.04 (0.99-1.09)                   | 0.16                 | 0.0047              | 3,976/55,904                |
| <i>ALMS1</i>              | rs7587577       | 2   | 73,832,786         | C                   | T     | 1.17 (1.09-1.24)                   | 3.1x10 <sup>-6</sup> | 0.29                | 2,646/33,698                |
| <i>LRP2</i>               | rs57989581      | 2   | 170,194,459        | C                   | A     | 1.10 (0.98-1.24)                   | 0.11                 | 0.29                | 3,976/55,904                |
| <i>CPS1</i>               | rs715           | 2   | 211,543,055        | C                   | T     | 1.06 (1.00-1.12)                   | 0.069                | 0.38                | 3,976/55,904                |
| <i>TFDP2</i>              | rs1511299       | 3   | 141,716,072        | T                   | C     | 1.06 (1.00-1.12)                   | 0.068                | 0.39                | 3,976/55,904                |
| <i>SHROOM3</i>            | rs5020545       | 4   | 77,414,988         | T                   | C     | 1.05 (1.00-1.12)                   | 0.064                | 0.22                | 3,976/55,904                |
| <i>DAB2-C9</i>            | chr5:39404526:D | 5   | 39,404,526         | D                   | R     | 1.09 (1.02-1.16)                   | 0.0084               | 0.63                | 2,646/33,698                |
| <i>SLC34A1</i>            | rs35716097      | 5   | 176,806,636        | T                   | C     | 1.10 (1.04-1.16)                   | 0.0011               | 0.84                | 3,976/55,904                |
| <i>LOC100132354-VEGFA</i> | rs881858        | 6   | 43,806,609         | A                   | G     | 1.06 (1.00-1.12)                   | 0.057                | 0.010               | 3,976/55,904                |
| <i>SLC22A2</i>            | rs316009        | 6   | 160,675,764        | C                   | T     | 1.13 (1.03-1.24)                   | 0.0089               | 0.52                | 3,976/55,904                |
| <i>UNCX</i>               | rs62435145      | 7   | 1,286,567          | T                   | G     | 1.18 (1.11-1.25)                   | 2.2x10 <sup>-7</sup> | 0.27                | 2,599/45,508                |
| <i>PHTF2</i>              | rs848486        | 7   | 77,552,127         | G                   | A     | 1.03 (0.98-1.08)                   | 0.31                 | 0.29                | 3,976/55,904                |
| <i>PRKAG2</i>             | rs10265221      | 7   | 151,414,329        | C                   | T     | 1.09 (1.02-1.16)                   | 0.023                | 0.43                | 3,976/55,904                |
| <i>PIP5K1B</i>            | rs4744712       | 9   | 71,434,707         | A                   | C     | 1.06 (1.01-1.11)                   | 0.016                | 0.78                | 3,976/55,904                |
| <i>DCDC5-MPPED2</i>       | rs963837        | 11  | 30,749,090         | T                   | C     | 1.04 (0.99-1.10)                   | 0.15                 | 0.49                | 3,976/55,904                |
| <i>SPATA5L1-GATM</i>      | rs2486288       | 15  | 45,712,339         | C                   | T     | 1.09 (1.03-1.16)                   | 0.0049               | 0.098               | 3,976/55,904                |
| <i>WDR72</i>              | rs1031755       | 15  | 53,951,435         | A                   | C     | 1.09 (1.03-1.15)                   | 0.0033               | 0.99                | 3,976/55,904                |
| <i>PDILT-UMOD</i>         | rs77924615      | 16  | 20,392,332         | G                   | A     | 1.18 (1.10-1.26)                   | 4.0x10 <sup>-6</sup> | 0.11                | 3,976/55,904                |
| <i>BCAS3</i>              | rs9895661       | 17  | 59,456,589         | C                   | T     | 1.06 (1.01-1.12)                   | 0.020                | 0.70                | 3,976/55,904                |
| <i>NFATC1</i>             | rs8096658       | 18  | 77,156,537         | G                   | C     | 1.07 (1.00-1.14)                   | 0.040                | 0.13                | 2,599/45,508                |

Chr: chromosome. OR: odds ratio. CI: confidence interval.

<sup>a</sup>Effect allele is eGFR decreasing allele.

**Table S8. Association summary statistics for eGFR for lead SNPs in 3,961/9,197 type 1/2 diabetes cases, all of European ancestry, from the SUMMIT Consortium.**

| Locus                     | Lead SNP        | Chr | Position (bp, b37) | Alleles             |       | Type 1 diabetes cases |         |       | Type 2 diabetes cases |                      |       | All diabetes cases combined |                      |                     |        |
|---------------------------|-----------------|-----|--------------------|---------------------|-------|-----------------------|---------|-------|-----------------------|----------------------|-------|-----------------------------|----------------------|---------------------|--------|
|                           |                 |     |                    | Effect <sup>a</sup> | Other | Beta (SE)             | p-value | N     | Beta (SE)             | p-value              | N     | Beta (SE)                   | p-value              | Cochran's Q p-value | N      |
| <i>GCKR</i>               | rs1260326       | 2   | 27,730,940         | C                   | T     | -0.768 (0.618)        | 0.21    | 3,961 | -0.204 (0.543)        | 0.71                 | 9,197 | -0.450 (0.408)              | 0.27                 | 0.49                | 13,158 |
| <i>ALMS1</i>              | rs7587577       | 2   | 73,832,786         | C                   | T     | -0.977 (0.746)        | 0.19    | 3,961 | -1.472 (0.611)        | 0.016                | 9,197 | -1.273 (0.473)              | 0.0071               | 0.61                | 13,158 |
| <i>LRP2</i>               | rs57989581      | 2   | 170,194,459        | C                   | A     | -8.085 (4.266)        | 0.058   | 1,313 | -3.417 (2.127)        | 0.11                 | 9,197 | -4.346 (1.904)              | 0.022                | 0.33                | 10,510 |
| <i>CPS1</i>               | rs715           | 2   | 211,543,055        | C                   | T     | -0.292 (0.662)        | 0.66    | 3,961 | 0.517 (0.571)         | 0.37                 | 9,197 | 0.172 (0.432)               | 0.69                 | 0.35                | 13,158 |
| <i>TFDP2</i>              | rs1511299       | 3   | 141,716,072        | T                   | C     | 0.019 (0.701)         | 0.98    | 3,961 | -0.228 (0.585)        | 0.70                 | 9,197 | -0.126 (0.449)              | 0.78                 | 0.79                | 13,158 |
| <i>SHROOM3</i>            | rs5020545       | 4   | 77,414,988         | T                   | C     | -1.051 (0.616)        | 0.088   | 3,961 | -0.777 (0.522)        | 0.14                 | 9,197 | -0.892 (0.398)              | 0.025                | 0.73                | 13,158 |
| <i>DAB2-C9</i>            | chr5:39404526:D | 5   | 39,404,526         | D                   | R     | -1.165 (0.615)        | 0.058   | 3,961 | 0.363 (0.532)         | 0.49                 | 9,197 | -0.291 (0.402)              | 0.47                 | 0.060               | 13,158 |
| <i>SLC34A1</i>            | rs35716097      | 5   | 176,806,636        | T                   | C     | -0.876 (0.658)        | 0.18    | 3,961 | -0.507 (0.584)        | 0.39                 | 9,197 | -0.669 (0.437)              | 0.13                 | 0.68                | 13,158 |
| <i>LOC100132354-VEGFA</i> | rs881858        | 6   | 43,806,609         | A                   | G     | -0.356 (0.656)        | 0.59    | 3,961 | -0.809 (0.557)        | 0.15                 | 9,197 | -0.619 (0.424)              | 0.14                 | 0.60                | 13,158 |
| <i>SLC22A2</i>            | rs316009        | 6   | 160,675,764        | C                   | T     | 0.268 (1.075)         | 0.80    | 3,961 | -1.241 (0.827)        | 0.13                 | 9,197 | -0.680 (0.655)              | 0.30                 | 0.27                | 13,158 |
| <i>UNCX</i>               | rs62435145      | 7   | 1,286,567          | T                   | G     | -0.884 (0.645)        | 0.17    | 3,961 | -0.341 (0.600)        | 0.57                 | 9,197 | -0.593 (0.440)              | 0.18                 | 0.54                | 13,158 |
| <i>PHTF2</i>              | rs848486        | 7   | 77,552,127         | G                   | A     | 0.076 (0.616)         | 0.90    | 3,961 | -0.260 (0.531)        | 0.62                 | 9,197 | -0.117 (0.402)              | 0.77                 | 0.68                | 13,158 |
| <i>PRKAG2</i>             | rs10265221      | 7   | 151,414,329        | C                   | T     | -1.273 (0.731)        | 0.082   | 3,961 | -2.129 (0.604)        | 0.00043              | 9,197 | -1.782 (0.466)              | 0.00013              | 0.37                | 13,158 |
| <i>PIP5K1B</i>            | rs4744712       | 9   | 71,434,707         | A                   | C     | -0.640 (1.003)        | 0.52    | 1,313 | 0.475 (0.536)         | 0.38                 | 9,197 | -0.227 (0.473)              | 0.63                 | 0.33                | 10,510 |
| <i>DCDC5-MPPED2</i>       | rs963837        | 11  | 30,749,090         | T                   | C     | -0.336 (0.614)        | 0.58    | 3,961 | -0.872 (0.543)        | 0.11                 | 9,197 | -0.637 (0.407)              | 0.12                 | 0.51                | 13,158 |
| <i>SPATA5L1-GATM</i>      | rs2486288       | 15  | 45,712,339         | C                   | T     | -0.711 (0.617)        | 0.25    | 3,961 | -1.159 (0.544)        | 0.033                | 9,197 | -0.963 (0.408)              | 0.018                | 0.59                | 13,158 |
| <i>WDR72</i>              | rs1031755       | 15  | 53,951,435         | A                   | C     | 1.758 (0.702)         | 0.012   | 3,961 | -1.018 (0.627)        | 0.10                 | 9,197 | 0.212 (0.468)               | 0.65                 | 0.0032              | 13,158 |
| <i>PDILT-UMOD</i>         | rs77924615      | 16  | 20,392,332         | G                   | A     | -1.405 (0.760)        | 0.064   | 3,961 | -2.915 (0.668)        | 1.3x10 <sup>-5</sup> | 9,197 | -2.256 (0.502)              | 6.9x10 <sup>-6</sup> | 0.14                | 13,158 |
| <i>BCAS3</i>              | rs9895661       | 17  | 59,456,589         | C                   | T     | -0.943 (0.771)        | 0.22    | 3,961 | -0.471 (0.723)        | 0.51                 | 9,197 | -0.692 (0.527)              | 0.19                 | 0.66                | 13,158 |
| <i>NFATC1</i>             | rs8096658       | 18  | 77,156,537         | G                   | C     | -0.617 (0.630)        | 0.33    | 3,961 | -2.235 (0.578)        | 0.00011              | 9,197 | -1.495 (0.426)              | 0.00045              | 0.058               | 13,158 |

Chr: chromosome. SE: standard error.

<sup>a</sup>Effect allele is eGFR decreasing allele from trans-ethnic meta-analysis.



**Table S9. Properties of 99% credible sets of variants at eGFR loci on the basis of trans-ethnic meta-analysis of 71,638 individuals.**

| Locus                     | Lead SNP        | Chr | Position<br>(bp, b37) | 99% credible set |               |                         |
|---------------------------|-----------------|-----|-----------------------|------------------|---------------|-------------------------|
|                           |                 |     |                       | SNPs             | Distance (bp) | Interval (bp, b37)      |
| <i>GCKR</i>               | rs1260326       | 2   | 27,730,940            | 3                | 11,664        | 27,730,940-27,742,603   |
| <i>ALMS1</i>              | rs7587577       | 2   | 73,832,786            | 159              | 278,238       | 73,622,663-73,900,900   |
| <i>LRP2</i>               | rs57989581      | 2   | 170,194,459           | 6                | 10,315        | 170,194,459-170,204,773 |
| <i>CPS1</i>               | rs715           | 2   | 211,543,055           | 9                | 40,636        | 211,540,507-211,581,142 |
| <i>TFDP2</i>              | rs1511299       | 3   | 141,716,072           | 123              | 221,865       | 141,637,438-141,859,302 |
| <i>SHROOM3</i>            | rs5020545       | 4   | 77,414,988            | 6                | 20,971        | 77,394,018-77,414,988   |
| <i>DAB2-C9</i>            | chr5:39404526:D | 5   | 39,404,526            | 31               | 68,620        | 39,359,773-39,428,392   |
| <i>SLC34A1</i>            | rs35716097      | 5   | 176,806,636           | 2                | 562           | 176,806,636-176,807,197 |
| <i>LOC100132354-VEGFA</i> | rs881858        | 6   | 43,806,609            | 16               | 14,135        | 43,804,808-43,818,942   |
| <i>SLC22A2</i>            | rs316009        | 6   | 160,675,764           | 99               | 126,912       | 160,631,670-160,758,581 |
| <i>UNCX</i>               | rs62435145      | 7   | 1,286,567             | 7                | 11,947        | 1,281,064-1,293,010     |
| <i>PHTF2</i>              | rs848486        | 7   | 77,552,127            | 180              | 478,315       | 77,112,367-77,590,681   |
| <i>PRKAG2</i>             | rs10265221      | 7   | 151,414,329           | 13               | 9,719         | 151,405,818-151,415,536 |
| <i>PIP5K1B</i>            | rs4744712       | 9   | 71,434,707            | 5                | 3,534         | 71,431,174-71,434,707   |
| <i>DCDC5-MPPED2</i>       | rs963837        | 11  | 30,749,090            | 4                | 27,925        | 30,749,090-30,777,014   |
| <i>SPATA5L1-GATM</i>      | rs2486288       | 15  | 45,712,339            | 49               | 114,098       | 45,614,502-45,728,599   |
| <i>WDR72</i>              | rs1031755       | 15  | 53,951,435            | 20               | 49,581        | 53,915,766-53,965,346   |
| <i>PDILT-UMOD</i>         | rs77924615      | 16  | 20,392,332            | 1                | 1             | 20,392,332-20,393,332   |
| <i>BCAS3</i>              | rs9895661       | 17  | 59,456,589            | 6                | 22,488        | 59,449,636-59,472,123   |
| <i>NFATC1</i>             | rs8096658       | 18  | 77,156,537            | 2                | 435           | 77,156,103-77,156,537   |

Chr: chromosome.

**Table S10. Membership of 99% credible sets containing no more than five variants on the basis of MANTRA trans-ethnic fine-mapping analysis of 71,638 individuals.**

| Locus               | Lead SNP   | 99% credible set |     |                    |                            |              |        |       |                       |        |                      |                               |
|---------------------|------------|------------------|-----|--------------------|----------------------------|--------------|--------|-------|-----------------------|--------|----------------------|-------------------------------|
|                     |            | Variant          | Chr | Position (bp, b37) | Effect allele <sup>a</sup> | Other allele | Beta   | SE    | p-value               | N      | log <sub>10</sub> BF | Posterior probability $\pi_c$ |
| <i>GCKR</i>         | rs1260326  | rs1260326        | 2   | 27,730,940         | C                          | T            | -0.872 | 0.114 | 6.1x10 <sup>-14</sup> | 71,638 | 12.23                | 0.938                         |
|                     |            | rs780094         | 2   | 27,741,237         | C                          | T            | -0.810 | 0.113 | 2.0x10 <sup>-12</sup> | 71,638 | 10.59                | 0.021                         |
|                     |            | rs780093         | 2   | 27,742,603         | C                          | T            | -0.821 | 0.114 | 1.3x10 <sup>-12</sup> | 71,638 | 10.84                | 0.038                         |
| <i>SLC34A1</i>      | rs35716097 | rs35716097       | 5   | 176,806,636        | T                          | C            | -1.097 | 0.127 | 2.2x10 <sup>-17</sup> | 71,638 | 15.92                | 0.946                         |
|                     |            | rs12659266       | 5   | 176,807,197        | T                          | C            | -1.109 | 0.134 | 4.3x10 <sup>-16</sup> | 71,638 | 14.60                | 0.045                         |
| <i>PIP5K1B</i>      | rs4744712  | rs7042786        | 9   | 71,431,174         | A                          | T            | -0.727 | 0.113 | 2.1x10 <sup>-10</sup> | 71,637 | 8.36                 | 0.117                         |
|                     |            | rs2039424        | 9   | 71,432,174         | G                          | A            | -0.689 | 0.113 | 2.0x10 <sup>-9</sup>  | 71,638 | 7.57                 | 0.019                         |
|                     |            | rs1556751        | 9   | 71,433,212         | G                          | A            | -0.666 | 0.113 | 7.0x10 <sup>-9</sup>  | 71,638 | 6.78                 | 0.003                         |
|                     |            | rs10746942       | 9   | 71,434,465         | G                          | A            | -0.688 | 0.114 | 2.5x10 <sup>-9</sup>  | 71,637 | 7.54                 | 0.018                         |
|                     |            | rs4744712        | 9   | 71,434,707         | A                          | C            | -0.753 | 0.112 | 3.3x10 <sup>-11</sup> | 71,638 | 9.21                 | 0.835                         |
| <i>DCDC5-MPPED2</i> | rs963837   | rs963837         | 11  | 30,749,090         | T                          | C            | -0.685 | 0.114 | 3.7x10 <sup>-9</sup>  | 71,638 | 7.37                 | 0.920                         |
|                     |            | rs3925584        | 11  | 30,760,335         | T                          | C            | -0.647 | 0.121 | 1.5x10 <sup>-7</sup>  | 65,983 | 5.84                 | 0.027                         |
|                     |            | rs10767873       | 11  | 30,768,678         | C                          | T            | -0.628 | 0.115 | 8.2x10 <sup>-8</sup>  | 71,638 | 6.04                 | 0.043                         |
|                     |            | chr11:30777014:l | 11  | 30,777,014         | R                          | I            | -0.656 | 0.130 | 6.4x10 <sup>-7</sup>  | 48,102 | 5.24                 | 0.007                         |
| <i>PDILT-UMOD</i>   | rs77924615 | rs77924615       | 16  | 20,392,332         | G                          | A            | -1.185 | 0.147 | 1.7x10 <sup>-15</sup> | 71,638 | 14.23                | 1.000                         |
| <i>NFATC1</i>       | rs8096658  | rs71359461       | 18  | 77,156,103         | C                          | G            | -0.786 | 0.146 | 1.2x10 <sup>-7</sup>  | 59,864 | 5.95                 | 0.113                         |
|                     |            | rs8096658        | 18  | 77,156,537         | G                          | C            | -0.814 | 0.141 | 1.3x10 <sup>-8</sup>  | 59,864 | 6.84                 | 0.876                         |
|                     |            | rs138901831      | 18  | 77,160,067         | G                          | C            | -0.827 | 0.169 | 1.5x10 <sup>-6</sup>  | 59,864 | 4.78                 | 0.008                         |

Chr: chromosome. SE: standard error.

<sup>a</sup>Effect allele is eGFR decreasing allele.

**Table S11. Posterior probability of driving eGFR association signals across for each single nucleotide variant annotation.**

| Annotation <sup>a</sup> | Number of single nucleotide variants | Posterior probability of driving association signals |            |
|-------------------------|--------------------------------------|------------------------------------------------------|------------|
|                         |                                      | Total                                                | Percentage |
| Missense                | 317                                  | 1.04                                                 | 5.39       |
| 5' UTR                  | 249                                  | 0.14                                                 | 0.73       |
| 3' UTR                  | 709                                  | 1.02                                                 | 5.29       |
| Downstream              | 2099                                 | 0.3                                                  | 1.56       |
| Upstream                | 2473                                 | 0.12                                                 | 0.62       |
| Intronic                | 32384                                | 12.12                                                | 62.83      |
| Intergenic              | 13354                                | 2.83                                                 | 14.67      |
| Non-coding transcript   | 1135                                 | 0.97                                                 | 5.03       |
| Others                  | 1661                                 | 0.75                                                 | 3.89       |

<sup>a</sup>Annotations were prioritised by considering the most severe consequence of all those reported for each variant.

**Table S12. Genomic annotations of regulatory chromatin state from 93 cell types, Dnase I hypersensitivity sites from 145 cell types (DHS), and chromatin immuno-precipitation binding sites for 165 proteins (TF ChIP-seq) that were predictive of posterior probability of driving eGFR association signals ( $p < 0.00012$ , Bonferroni correction for 403 annotations).**

| Annotation             | Description          | Logistic regression model |       |                       | fGWAS            |
|------------------------|----------------------|---------------------------|-------|-----------------------|------------------|
|                        |                      | Effect                    | SE    | <i>p</i> -value       | Effect (95% CI)  |
| HDAC8                  | TF ChIP-seq          | 4.695                     | 0.614 | $1.1 \times 10^{-14}$ | 6.45 (4.21-8.40) |
| NFE2                   | TF ChIP-seq          | 4.676                     | 0.618 | $1.9 \times 10^{-14}$ | 4.72 (1.68-6.50) |
| FOSL1                  | TF ChIP-seq          | 3.866                     | 0.558 | $2.1 \times 10^{-12}$ | 4.40 (2.40-5.80) |
| RPTEC                  | Renal epithelial DHS | 2.194                     | 0.407 | $3.4 \times 10^{-8}$  | 3.37 (2.25-4.42) |
| HRCE                   | Renal epithelial DHS | 2.135                     | 0.436 | $4.7 \times 10^{-7}$  | 3.11 (1.96-4.17) |
| ATF3                   | TF ChIP-seq          | 3.010                     | 0.648 | $1.7 \times 10^{-6}$  | 3.66 (1.64-5.01) |
| fKidney_renal_cortex_L | Fetal kidney DHS     | 1.847                     | 0.430 | $8.8 \times 10^{-6}$  | 2.76 (1.62-3.82) |
| fKidney_L              | Fetal kidney DHS     | 1.881                     | 0.446 | $1.2 \times 10^{-5}$  | 3.22 (2.05-4.36) |
| fKidney_R              | Fetal kidney DHS     | 1.986                     | 0.475 | $1.4 \times 10^{-5}$  | 3.41 (2.25-4.60) |
| IRF4                   | TF ChIP-seq          | 3.069                     | 0.749 | $2.1 \times 10^{-5}$  | 3.84 (0.95-5.40) |
| fIntestine_Lg          | Fetal intestine DHS  | 2.088                     | 0.512 | $2.3 \times 10^{-5}$  | 2.96 (1.70-4.03) |
| fKidney_renal_pelvis   | Fetal kidney DHS     | 1.884                     | 0.465 | $2.5 \times 10^{-5}$  | 3.30 (2.15-4.22) |
| fKidney_renal_pelvis_L | Fetal kidney DHS     | 1.932                     | 0.489 | $3.9 \times 10^{-5}$  | 3.50 (2.35-4.64) |
| MAFK                   | TF ChIP-seq          | 2.375                     | 0.603 | $4.1 \times 10^{-5}$  | 3.03 (1.06-4.29) |
| HRE                    | Renal epithelial DHS | 1.903                     | 0.501 | $7.4 \times 10^{-5}$  | 2.87 (1.56-3.97) |
| fSkin                  | Fetal skin DHS       | 1.956                     | 0.523 | $9.2 \times 10^{-5}$  | 3.40 (2.22-4.45) |

SE: standard error. CI: confidence interval.

**Table S13. Variants with more than 80% posterior probability of driving eGFR association signals that overlap with enriched regulatory annotations and their impact on expression of most correlated gene in GTEx database.**

| Locus               | Lead SNP     | Posterior probability $\pi_c$ | Overlap with enriched regulatory annotations                                                            | Expression quantitative trait loci reported in GTEx database |               |                       |
|---------------------|--------------|-------------------------------|---------------------------------------------------------------------------------------------------------|--------------------------------------------------------------|---------------|-----------------------|
|                     |              |                               |                                                                                                         | Tissue                                                       | Gene          | <i>p</i> -value       |
| <i>PDILT-UMOD</i>   | rs77924615   | 1.000                         | fKidney_R, RPTEC, fKidney_L, fKidney_renal_pelvis_L, fKidney_renal_pelvis, fKidney_renal_pelvis_R, HRCE |                                                              |               |                       |
| <i>SLC34A1</i>      | rs35716097   | 0.946                         | RPTEC, HRCE, HDAC8                                                                                      | Adipose_Subcutaneous                                         | <i>RGS14</i>  | 4.1x10 <sup>-15</sup> |
|                     |              |                               |                                                                                                         | Adrenal_Gland                                                | <i>RGS14</i>  | 1.1x10 <sup>-11</sup> |
|                     |              |                               |                                                                                                         | Artery_Aorta                                                 | <i>RGS14</i>  | 6.4x10 <sup>-21</sup> |
|                     |              |                               |                                                                                                         | Artery_Coronary                                              | <i>RGS14</i>  | 2.8x10 <sup>-8</sup>  |
|                     |              |                               |                                                                                                         | Artery_Tibial                                                | <i>RGS14</i>  | 2.5x10 <sup>-28</sup> |
|                     |              |                               |                                                                                                         | Brain_Cerebellum                                             | <i>RGS14</i>  | 1.9x10 <sup>-9</sup>  |
|                     |              |                               |                                                                                                         | Breast_Mammary_Tissue                                        | <i>RGS14</i>  | 1.1x10 <sup>-8</sup>  |
|                     |              |                               |                                                                                                         | Cells_Transformed_fibroblasts                                | <i>RGS14</i>  | 1.9x10 <sup>-45</sup> |
|                     |              |                               |                                                                                                         | Colon_Sigmoid                                                | <i>RGS14</i>  | 9.3x10 <sup>-7</sup>  |
|                     |              |                               |                                                                                                         | Colon_Transverse                                             | <i>RGS14</i>  | 1.1x10 <sup>-14</sup> |
|                     |              |                               |                                                                                                         | Esophagus_Mucosa                                             | <i>RGS14</i>  | 5.2x10 <sup>-18</sup> |
|                     |              |                               |                                                                                                         | Esophagus_Muscularis                                         | <i>RGS14</i>  | 5.6x10 <sup>-13</sup> |
|                     |              |                               |                                                                                                         | Heart_Atrial_Appendage                                       | <i>RGS14</i>  | 3.9x10 <sup>-13</sup> |
|                     |              |                               |                                                                                                         | Heart_Left_Ventricle                                         | <i>RGS14</i>  | 1.4x10 <sup>-18</sup> |
|                     |              |                               |                                                                                                         | Lung                                                         | <i>RGS14</i>  | 3.9x10 <sup>-11</sup> |
|                     |              |                               |                                                                                                         | Muscle_Skeletal                                              | <i>RGS14</i>  | 1.3x10 <sup>-12</sup> |
|                     |              |                               |                                                                                                         | Nerve_Tibial                                                 | <i>RGS14</i>  | 6.1x10 <sup>-15</sup> |
|                     |              |                               |                                                                                                         | Pancreas                                                     | <i>RGS14</i>  | 1.4x10 <sup>-6</sup>  |
|                     |              |                               |                                                                                                         | Pituitary                                                    | <i>RGS14</i>  | 3.0x10 <sup>-13</sup> |
|                     |              |                               |                                                                                                         | Skin_Not_Sun_Exposed_Suprapubic                              | <i>RGS14</i>  | 2.1x10 <sup>-8</sup>  |
|                     |              |                               |                                                                                                         | Skin_Sun_Exposed_Lower_leg                                   | <i>RGS14</i>  | 5.9x10 <sup>-18</sup> |
| Stomach             | <i>RGS14</i> | 1.0x10 <sup>-11</sup>         |                                                                                                         |                                                              |               |                       |
| Testis              | <i>RGS14</i> | 1.5x10 <sup>-27</sup>         |                                                                                                         |                                                              |               |                       |
| Thyroid             | <i>RGS14</i> | 7.8x10 <sup>-15</sup>         |                                                                                                         |                                                              |               |                       |
| <i>DCDC5-MPPED2</i> | rs963837     | 0.920                         | fKidney_R, fKidney_renal_pelvis_L                                                                       |                                                              |               |                       |
| <i>NFATC1</i>       | rs8096658    | 0.877                         | fKidney_R, fKidney_L, fKidney_renal_pelvis, fKidney_renal_pelvis_R, fKidney_renal_pelvis_L              | Heart_Left_Ventricle                                         | <i>NFATC1</i> | 2.4x10 <sup>-9</sup>  |
|                     |              |                               |                                                                                                         | Muscle_Skeletal                                              | <i>NFATC1</i> | 2.8x10 <sup>-21</sup> |

|                |           |       |                      |               |                |                       |
|----------------|-----------|-------|----------------------|---------------|----------------|-----------------------|
| <i>PIP5K1B</i> | rs4744712 | 0.835 | fKidney_renal_pelvis | Artery_Aorta  | <i>PIP5K1B</i> | $3.6 \times 10^{-6}$  |
|                |           |       |                      | Artery_Tibial | <i>PIP5K1B</i> | $3.6 \times 10^{-14}$ |
|                |           |       |                      | Testis        | <i>PIP5K1B</i> | $1.9 \times 10^{-6}$  |

**Table S14. Estimated effects from the Cox proportional hazards model with robust standard errors, applied on the experimental *Drosophila melanogaster* survival data under isogenic and heterogenic conditions.**

**(a) Isogenic background**

| <b>Mutation</b> | <b>NaCl concentration</b> | <b>Log-hazard ratio</b> | <b>Robust SE</b> | <b>p-value</b>       |
|-----------------|---------------------------|-------------------------|------------------|----------------------|
| <i>d06164</i>   | 0.2                       | -1.4                    | 0.32             | $2.2 \times 10^{-5}$ |
|                 | 0.3                       | -2.4                    | 0.20             | $<10^{-16}$          |
|                 | 0.4                       | -2.7                    | 0.16             | $<10^{-16}$          |
|                 | 0.5                       | -2.2                    | 0.17             | $<10^{-16}$          |
| <i>EY-P283</i>  | 0.2                       | -0.29                   | 0.75             | 0.21                 |
|                 | 0.3                       | -1.9                    | 0.22             | $<10^{-16}$          |
|                 | 0.4                       | -2.3                    | 0.17             | $<10^{-16}$          |
|                 | 0.5                       | -1.7                    | 0.18             | $<10^{-16}$          |

**(b) Heterogenic background**

| <b>Mutation</b> | <b>NaCl concentration</b> | <b>Log-hazard ratio</b> | <b>Robust SE</b> | <b>p-value</b>        |
|-----------------|---------------------------|-------------------------|------------------|-----------------------|
| <i>d06164</i>   | 0.2                       | -2.1                    | 0.46             | $6.9 \times 10^{-6}$  |
|                 | 0.3                       | -1.9                    | 0.31             | $6.5 \times 10^{-10}$ |
|                 | 0.4                       | -1.8                    | 0.22             | $1.1 \times 10^{-16}$ |
|                 | 0.5                       | -1.4                    | 0.23             | $3.6 \times 10^{-10}$ |
| <i>EY-P283</i>  | 0.2                       | -1.6                    | 0.48             | 0.00078               |
|                 | 0.3                       | -2.3                    | 0.32             | $2.0 \times 10^{-12}$ |
|                 | 0.4                       | -0.18                   | 0.17             | 0.30                  |
|                 | 0.5                       | -0.042                  | 0.21             | 0.84                  |

SE: standard error

## **ADDITIONAL ACKNOWLEDGEMENTS**

**AUSTWIN.** We acknowledge funding from the Australian National Health and Medical Research Council (241944, 389875, 389891, 389892, 389938, 442915, 442981, 496739 and 552485), US National Institutes of Health (AA07535, AA10248 and AA014041) and the Australian Research Council (DP0770096).

**BBJ.** The BioBank Japan Project was supported by the Ministry of Education, Culture, Sports, Sciences and Technology of the Japanese government.

**HCHS/SOL.** The Hispanic Community Health Study / Study of Latinos was carried out as a collaborative study supported by contracts from the National Heart, Lung, and Blood Institute (NHLBI) to the University of North Carolina (N01-HC65233), University of Miami (N01-HC65234), Albert Einstein College of Medicine (N01-HC65235), Northwestern University (N01-HC65236), and San Diego State University (N01-HC65237). The following contribute to the HCHS/SOL through a transfer of funds to the NHLBI: National Center on Minority Health and Health Disparities, the National Institute of Deafness and Other Communications Disorders, the National Institute of Dental and Craniofacial Research (NIDCR), the National Institute of Diabetes and Digestive and Kidney Diseases, the National Institute of Neurological Disorders and Stroke, and the Office of Dietary Supplements. The Genetic Analysis Center at the University of Washington was supported by NHLBI and NIDCR contracts (HHSN268201300005C AM03 and MOD03).

**PIVUS and ULSAM.** These projects were supported by Knut and Alice Wallenberg Foundation (Wallenberg Academy Fellow), European Research Council (ERC Starting Grant), Swedish Diabetes Foundation (2013-024), Swedish Research Council (2012-1397, 2012-1727, and 2012-2215), Marianne and Marcus Wallenberg Foundation, County Council of Dalarna, Dalarna University, and Swedish Heart-Lung Foundation (20120197). The computations were performed on resources provided by SNIC through Uppsala Multidisciplinary Center for Advanced Computational Science (UPPMAX) under Project b2011036. Genotyping was funded by the Wellcome Trust under award WT064890. Analysis of genetic data was funded by the Wellcome Trust under awards WT098017 and WT090532. We thank the SNP&SEQ Technology Platform in Uppsala ([www.genotyping.se](http://www.genotyping.se)) for excellent genotyping.

**WHI.** The Women's Health Initiative program is funded by the National Heart, Lung, and Blood Institute, National Institutes of Health, US Department of Health and Human Services, through contracts HHSN268201100046C, HHSN268201100001C, HHSN268201100002C, HHSN268201100003C, HHSN268201100004C, and HHSN271201100004C.
